# Supplementary material for: Evaluation of Prognostic Factors for the Parotid Cancer Treated With Surgery and Postoperative Radiotherapy
Source: PubMed Central journal article supplement — Clin Exp Otorhinolaryngol. 2019 Sep 5;13(1):69–76. doi: 10.21053/ceo.2019.00388 (PMC7010496; doi:10.21053/ceo.2019.00388), 2019-09-05
Supplement: ceo-2019-00388-suppl.pdf [file ceo-2019-00388-suppl.pdf]

Supplementary Table 1. Clinicopathological details of patients with local recurrence

| No. | Age (yr) | Sex    | ND  | LVI | Histology | D-grade | H-grade | Radiation dose (cGy) | pT | pN | Recurrence site    |
|-----|----------|--------|-----|-----|-----------|---------|---------|----------------------|----|----|--------------------|
| 1   | 50       | Male   | No  | No  | MEC       | Well    | Low     | 6,600                | 2  | 0  | Op bed             |
| 2   | 52       | Male   | Yes | Yes | SDC       | High    | High    | 5,040                | 3  | 2b | Op bed, skull base |
| 3   | 72       | Male   | Yes | No  | MEC       | High    | High    | 5,040                | 3  | 2b | Op bed             |
| 4   | 67       | Female | No  | No  | EMC       | Well    | Low     | 5,040                | 3  | 0  | Op bed             |
| 5   | 62       | Male   | Yes | Yes | ADC       | High    | High    | 4,500                | 4a | 2  | Op bed, skin       |
| 6   | 82       | Male   | Yes | No  | CXPA      | Well    | Low     | 5,040                | 3  | 1  | Op bed             |
| 7   | 81       | Male   | Yes | No  | ADC       | Well    | High    | 5,040                | 3  | 1  | Op bed             |

ND, neck dissection; LVI, lymphovascular invasion; D, differentiation; H, histologic; pT, pathological T stage; pN, pathological N stage; MEC, mucoepidermoid carcinoma; Op, operation; SDC, salivary duct carcinoma; EMC, epithelial-myoeplithelial carcinoma; ADC, adenocarcinoma, not otherwise specified; CXPA, carcinoma ex pleomorphic adenoma.

Supplementary Table 2. Clinicopathological details of patients with distant metastases

| No. | Age (yr) | Sex    | ND  | LVI | Histology | D-grade    | H-grade | Radiation dose (cGy) | pT | pN | Recurrence site        |
|-----|----------|--------|-----|-----|-----------|------------|---------|----------------------|----|----|------------------------|
| 1   | 56       | Male   | No  | No  | MEC       | Poorly     | High    | 6,210                | 2  | 0  | Lung                   |
| 2   | 52       | Male   | Yes | Yes | SDC       | Poorly     | High    | 5,040                | 3  | 2b | Axilla LN, mediastinum |
| 3   | 55       | Male   | Yes | No  | SDC       | Well       | High    | 5,400                | 2  | 0  | Lung                   |
| 4   | 58       | Male   | Yes | Yes | LCC       | Poorly     | High    | 5,940                | 4a | 2b | Lung, axilla LN        |
| 5   | 73       | Male   | Yes | No  | SDC       | Poorly     | High    | 5,040                | 4a | 0  | Lung                   |
| 6   | 33       | Male   | No  | No  | SDC       | Poorly     | High    | 5,040                | 4a | 0  | Lung                   |
| 7   | 81       | Male   | Yes | No  | SDC       | Well       | High    | 5,040                | 3  | 1  | Lung                   |
| 8   | 71       | Male   | Yes | Yes | ADC       | Poorly     | High    | 5,040                | 2  | 2b | Lung, axilla LN        |
| 9   | 56       | Male   | Yes | Yes | ADC       | Poorly     | High    | 5,040                | 4a | 0  | Lung                   |
| 10  | 65       | Male   | Yes | Yes | ADC       | Poorly     | High    | 5,400                | 2  | 2b | Lung                   |
| 11  | 72       | Female | Yes | No  | SCC       | Poorly     | High    | 6,000                | 4a | 0  | Lung                   |
| 12  | 54       | Male   | Yes | No  | SCC       | Moderately | High    | 5,940                | 4a | 2b | Lung                   |

ND, neck dissection; LVI, lymphovascular invasion; D, differentiation; H, histologic; pT, pathological T stage; pN, pathological N stage; MEC, mucoepidermoid carcinoma; SDC, salivary duct carcinoma; LN, lymph node; LCC, large cell undifferentiated carcinoma; ADC, adenocarcinoma, not otherwise specified; SCC, squamous cell carcinoma.
